# Supplementary material for: Physical activity and mental health: a systematic review and best-evidence synthesis of mediation and moderation studies
Source: Springer Nature journal article supplement (doi:10.1186/s12966-024-01676-6), 2024-11-28
Supplement: MOESM1 [file 12966_2024_1676_MOESM1_ESM.pdf]

### Supplementary File 1: Search Terms

| Mental health cluster      | Physical activity cluster | Mediation/moderation cluster |
|----------------------------|---------------------------|------------------------------|
| "mental health"            | "physical activit*"       | moderation                   |
| "mental well*being"        | "physical inactivity"     | mediation                    |
| "psychological well*being" | exercise                  | moderator                    |
| "subjective well*being"    | sport*                    | mediator                     |
| "life satisfaction"        | walking                   | moderated                    |
| "positive affect"          |                           | mediated                     |
| "negative affect"          |                           | moderating                   |
| "mental ill*"              |                           | mediating                    |
| "mental disorder*"         |                           |                              |
| depress*                   |                           |                              |
| anxiety                    |                           |                              |
| stress                     |                           |                              |
| "psychological distress"   |                           |                              |

### Exported search from Scopus

TITLE-ABS-KEY ( "mental health" ) OR TITLE-ABS-KEY ( "mental well\*being" ) OR  
 TITLE-ABS-KEY ( "psychological well\*being" ) OR TITLE-ABS-KEY ( "subjective  
 well\*being" ) OR TITLE-ABS-KEY ( "life satisfaction" ) OR TITLE-ABS-KEY ( "positive  
 affect" ) OR TITLE-ABS-KEY ( "negative affect" ) OR TITLE-ABS-KEY ( "mental ill\*" )  
 OR TITLE-ABS-KEY ( "mental disorder\*" ) OR TITLE-ABS-KEY ( depress\* ) OR TITLE-  
 ABS-KEY ( anxiety ) OR TITLE-ABS-KEY ( stress ) OR TITLE-ABS-KEY (   
 "psychological distress" ) AND TITLE-ABS-KEY ( "physical activit\*" ) OR TITLE-ABS-  
 KEY ( "physical inactivity" ) OR TITLE-ABS-KEY ( exercise ) OR TITLE-ABS-KEY (   
 sport\* ) OR TITLE-ABS-KEY ( walking ) AND TITLE-ABS-KEY ( moderation ) OR  
 TITLE-ABS-KEY ( mediation ) OR TITLE-ABS-KEY ( moderator ) OR TITLE-ABS-KEY  
 ( mediator ) OR TITLE-ABS-KEY ( moderated ) OR TITLE-ABS-KEY ( mediated ) OR  
 TITLE-ABS-KEY ( moderating ) OR TITLE-ABS-KEY ( mediating )
